# Supplementary material
Source: publisher site journal article supplement (https://www.spandidos-publications.com/1522/downloadSupplementary)

Figure S1. Effect of BNIP3 on p38 phosphorylation and MAPK signaling pathway. si-BNIP3 and pcDNA-BNIP3 were transfected into PANC-1 and SW1990 cell lines, respectively. Western blot analysis was used to detect the protein levels of p-p38 and p38. \*\*\*P<0.001 vs. si-control, \*\*P<0.01 vs. si-control or pcDNA. Each experiment was repeated 3 times. BNIP3, Bcl-2/adenovirus E1B-19kDa-interacting protein 3.

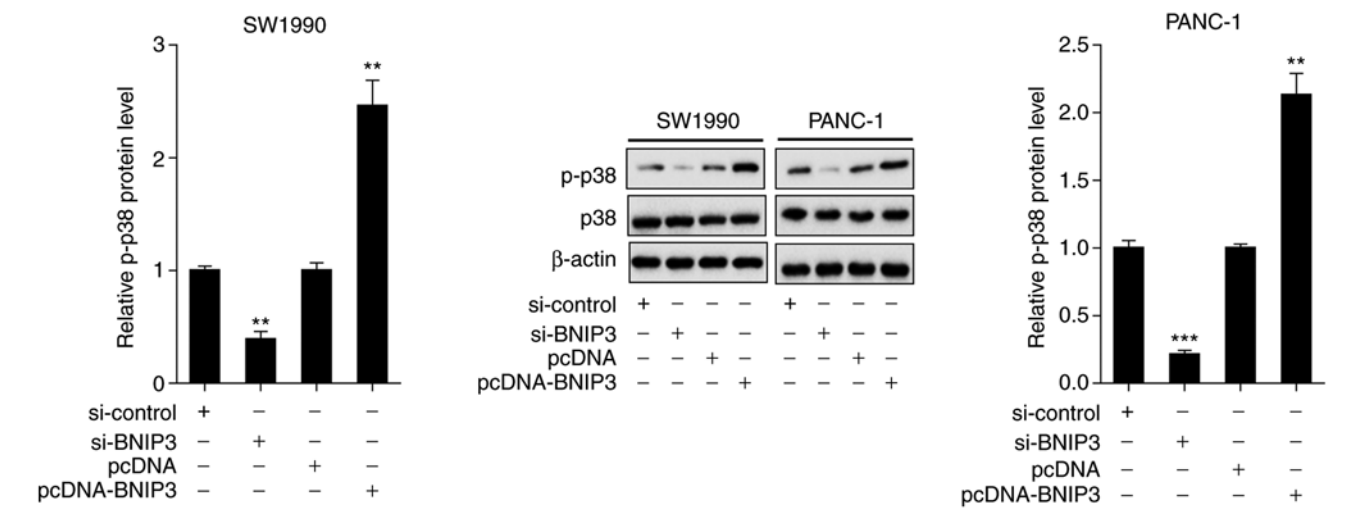

Supplement: Supplementary file 1 [file downloadSupplementary]
